# Supplementary material
Source: publisher figshare collection journal article supplement (https://tandf.figshare.com/articles/dataset/_/21665289)
Supplement: Supplementary file 1 [file 2]

| Gene   | PacBio accession | Peptide sequence         | CPM      | Raw mass spectrum      | Manual spectrum annotation validation notes                                                                                                                                                                                                     | Passed Manual Annotation | Raw file name                          | Scan Number | Annotation of the novelty event | Event of the novel event on the protein isoform sequence | Maps to a single isoform  | Link to corresponding UCSC browser track                                                                                                                                                                                                                                                                                                                                                                                                                                                                                                                                                                                                                                                                                                                                                                                                                                                                                                                                                                                                                              | Isoform track image | Zoom in of image |
|--------|------------------|--------------------------|----------|------------------------|-------------------------------------------------------------------------------------------------------------------------------------------------------------------------------------------------------------------------------------------------|--------------------------|----------------------------------------|-------------|---------------------------------|----------------------------------------------------------|---------------------------|-----------------------------------------------------------------------------------------------------------------------------------------------------------------------------------------------------------------------------------------------------------------------------------------------------------------------------------------------------------------------------------------------------------------------------------------------------------------------------------------------------------------------------------------------------------------------------------------------------------------------------------------------------------------------------------------------------------------------------------------------------------------------------------------------------------------------------------------------------------------------------------------------------------------------------------------------------------------------------------------------------------------------------------------------------------------------|---------------------|------------------|
| FXR1   | PB.3060.6        | GYATDESTVS SVQGSR        | 6.014723 |                        | Minimum 9 amino acids, Score>5, delta mass<5ppm, PEP<0.005, good b and y ion series, extra peaks do not exceed 25% above 10% relative intensity; MS2 TIC approx 44% (rough minimum is 20%)                                                      | Yes                      | 210827_HUVEC5.6_tryp_HCDorbi_4hr_F r4  | 58931       | Intron retention event          | Insertion                                                | No (PB.3060.6, PB.3060.8) | <a href="https://genome.ucsc.edu/cgi-bin/hgTracks?db=hg38&amp;lastVirtModeType=customUrl&amp;lastVirtModeExtraState=multiRegionsBedUrl%3D%2Fuserdata%2Fsession%2Frr%2F13%2Fmm5db%2F0c7bcef%2Fhg%2FcustRgn_genome_1e56d_a22290.bed+0&amp;virtModeType=customUrl&amp;virtMode=1&amp;multiRegionsBedUrl=%2Fuserdata%2Fsessions%2Frr%2F13%2Fmm5db%2F0c7bcef%2Fhg%2FcustRgn_genome_1e56d_a22290.bed&amp;nonVirtPosition=chr3%3A449674383%2D49874573&amp;position=multi%3A58605299%2D58605489&amp;hgslid=13238013734Vn42a7GvdrAaCReEnrBP6l">https://genome.ucsc.edu/cgi-bin/hgTracks?db=hg38&amp;lastVirtModeType=customUrl&amp;lastVirtModeExtraState=multiRegionsBedUrl%3D%2Fuserdata%2Fsession%2Frr%2F13%2Fmm5db%2F0c7bcef%2Fhg%2FcustRgn_genome_1e56d_a22290.bed+0&amp;virtModeType=customUrl&amp;virtMode=1&amp;multiRegionsBedUrl=%2Fuserdata%2Fsessions%2Frr%2F13%2Fmm5db%2F0c7bcef%2Fhg%2FcustRgn_genome_1e56d_a22290.bed&amp;nonVirtPosition=chr3%3A449674383%2D49874573&amp;position=multi%3A58605299%2D58605489&amp;hgslid=13238013734Vn42a7GvdrAaCReEnrBP6l</a> |                     |                  |
| APEH   | PB.2610.6        | AGPDGQVSPAQVLLSEPEEAALYR | 5.638803 |                        | Minimum 9 amino acids, Score>5, delta mass<5ppm, PEP<0.005, good b and y ion series, extra peaks do not exceed 25% above 10% relative intensity; MS2 TIC approx 24% (rough minimum is 20%); y9 ends in proline and is most abundant as expected | Yes                      | 210827_HUVEC5.6_tryp_HCDorbi_4hr_F r11 | 220913      | Intron retention event          | Insertion                                                | No (PB.2610.6, PB.2610.7) | <a href="https://genome.ucsc.edu/cgi-bin/hgTracks?db=hg38&amp;lastVirtModeType=customUrl&amp;lastVirtModeExtraState=multiRegionsBedUrl%3D%2Fuserdata%2Fsession%2Frr%2F13%2Fmm5db%2F0c7bcef%2Fhg%2FcustRgn_genome_1e56d_a22290.bed+0&amp;virtModeType=customUrl&amp;virtMode=1&amp;multiRegionsBedUrl=%2Fuserdata%2Fsessions%2Frr%2F13%2Fmm5db%2F0c7bcef%2Fhg%2FcustRgn_genome_1e56d_a22290.bed&amp;nonVirtPosition=chr3%3A449674383%2D49874573&amp;position=multi%3A58605299%2D58605489&amp;hgslid=13238013734Vn42a7GvdrAaCReEnrBP6l">https://genome.ucsc.edu/cgi-bin/hgTracks?db=hg38&amp;lastVirtModeType=customUrl&amp;lastVirtModeExtraState=multiRegionsBedUrl%3D%2Fuserdata%2Fsession%2Frr%2F13%2Fmm5db%2F0c7bcef%2Fhg%2FcustRgn_genome_1e56d_a22290.bed+0&amp;virtModeType=customUrl&amp;virtMode=1&amp;multiRegionsBedUrl=%2Fuserdata%2Fsessions%2Frr%2F13%2Fmm5db%2F0c7bcef%2Fhg%2FcustRgn_genome_1e56d_a22290.bed&amp;nonVirtPosition=chr3%3A449674383%2D49874573&amp;position=multi%3A58605299%2D58605489&amp;hgslid=13238013734Vn42a7GvdrAaCReEnrBP6l</a> |                     |                  |
| TUBA1A | PB.8359.9        | AVFVDLEPTVIGKEDANNYYR    | 2.631441 |                        | MS2 TIC only 13%, too many missing fragment ions and unassigned peaks, 1 missed cleavage                                                                                                                                                        | No                       | 210827_HUVEC5.6_tryp_HCDorbi_4hr_F r11 | 148203      |                                 |                                                          |                           |                                                                                                                                                                                                                                                                                                                                                                                                                                                                                                                                                                                                                                                                                                                                                                                                                                                                                                                                                                                                                                                                       |                     |                  |
| NASP   | PB.473.10        | ATLVESSTSGFTPGGGSS VSMR  | 1.879601 |                        | Minimum 9 amino acids, Score>5, delta mass<5ppm, PEP<0.005, good b and y ion series, extra peaks do not exceed 25% above 10% relative intensity; MS2 TIC approx 48% (rough minimum is 20%); y11 ending in proline is most abundant as expected  | Yes                      | 210827_HUVEC5.6_tryp_HCDorbi_4hr_F r12 | 113107      | Exon skipping event             | Deletion                                                 | Yes (PB.473.10)           | <a href="https://genome.ucsc.edu/cgi-bin/hgTracks?db=hg38&amp;lastVirtModeType=customUrl&amp;lastVirtModeExtraState=multiRegionsBedUrl%3D%2Fuserdata%2Fsession%2Frr%2F13%2Fmm5db%2F0c7bcef%2Fhg%2FcustRgn_genome_1e56d_a22290.bed+0&amp;virtModeType=customUrl&amp;virtMode=1&amp;multiRegionsBedUrl=%2Fuserdata%2Fsessions%2Frr%2F13%2Fmm5db%2F0c7bcef%2Fhg%2FcustRgn_genome_1e56d_a22290.bed&amp;nonVirtPosition=chr3%3A449674383%2D49874573&amp;position=multi%3A58605299%2D58605489&amp;hgslid=13238013734Vn42a7GvdrAaCReEnrBP6l">https://genome.ucsc.edu/cgi-bin/hgTracks?db=hg38&amp;lastVirtModeType=customUrl&amp;lastVirtModeExtraState=multiRegionsBedUrl%3D%2Fuserdata%2Fsession%2Frr%2F13%2Fmm5db%2F0c7bcef%2Fhg%2FcustRgn_genome_1e56d_a22290.bed+0&amp;virtModeType=customUrl&amp;virtMode=1&amp;multiRegionsBedUrl=%2Fuserdata%2Fsessions%2Frr%2F13%2Fmm5db%2F0c7bcef%2Fhg%2FcustRgn_genome_1e56d_a22290.bed&amp;nonVirtPosition=chr3%3A449674383%2D49874573&amp;position=multi%3A58605299%2D58605489&amp;hgslid=13238013734Vn42a7GvdrAaCReEnrBP6l</a> |                     |                  |
| NASP   | PB.473.10        | ATLVESSTSGFTPGGGSS VSMR  | 1.879601 | same sequence as above |                                                                                                                                                                                                                                                 |                          | 210827_HUVEC5.6_tryp_HCDorbi_4hr_F r7  | 83077       |                                 |                                                          |                           |                                                                                                                                                                                                                                                                                                                                                                                                                                                                                                                                                                                                                                                                                                                                                                                                                                                                                                                                                                                                                                                                       |                     |                  |
| MAP4   | PB.2568.9        | KKPQSETSQIEGSPTEFLEEK    | 3.007362 |                        | Minimum 9 amino acids, Score>5, delta mass<5ppm, PEP<0.005, good b and y ion series, extra peaks do not exceed 25% above 10% relative intensity; MS2 TIC approx 27% (rough minimum is 20%); y8 ending in proline is most abundant as expected   | Yes                      | 210827_HUVEC5.6_tryp_HCDorbi_4hr_F r8  | 86426       | Exon skipping event             | Deletion                                                 | Yes (PB.2568.9)           | <a href="https://genome.ucsc.edu/cgi-bin/hgTracks?db=hg38&amp;lastVirtModeType=customUrl&amp;lastVirtModeExtraState=multiRegionsBedUrl%3D%2Fuserdata%2Fsession%2Frr%2F13%2Fmm5db%2F0c7bcef%2Fhg%2FcustRgn_genome_1e56d_a22290.bed+0&amp;virtModeType=customUrl&amp;virtMode=1&amp;multiRegionsBedUrl=%2Fuserdata%2Fsessions%2Frr%2F13%2Fmm5db%2F0c7bcef%2Fhg%2FcustRgn_genome_1e56d_a22290.bed&amp;nonVirtPosition=chr3%3A449674383%2D49874573&amp;position=multi%3A58605299%2D58605489&amp;hgslid=13238013734Vn42a7GvdrAaCReEnrBP6l">https://genome.ucsc.edu/cgi-bin/hgTracks?db=hg38&amp;lastVirtModeType=customUrl&amp;lastVirtModeExtraState=multiRegionsBedUrl%3D%2Fuserdata%2Fsession%2Frr%2F13%2Fmm5db%2F0c7bcef%2Fhg%2FcustRgn_genome_1e56d_a22290.bed+0&amp;virtModeType=customUrl&amp;virtMode=1&amp;multiRegionsBedUrl=%2Fuserdata%2Fsessions%2Frr%2F13%2Fmm5db%2F0c7bcef%2Fhg%2FcustRgn_genome_1e56d_a22290.bed&amp;nonVirtPosition=chr3%3A449674383%2D49874573&amp;position=multi%3A58605299%2D58605489&amp;hgslid=13238013734Vn42a7GvdrAaCReEnrBP6l</a> |                     |                  |

|         |                                                              |                                               |                                                                                                       |                                                                                                                                                                                                                                                     |     |                                              |        |                                                                                         |           |                                         |                                                                                                                                                                                                                                                                                                                                                                                                                                                                                                                                                                                                                                                                                                                                                                                                                                                                                                                                                                                                                                                                 |  |  |
|---------|--------------------------------------------------------------|-----------------------------------------------|-------------------------------------------------------------------------------------------------------|-----------------------------------------------------------------------------------------------------------------------------------------------------------------------------------------------------------------------------------------------------|-----|----------------------------------------------|--------|-----------------------------------------------------------------------------------------|-----------|-----------------------------------------|-----------------------------------------------------------------------------------------------------------------------------------------------------------------------------------------------------------------------------------------------------------------------------------------------------------------------------------------------------------------------------------------------------------------------------------------------------------------------------------------------------------------------------------------------------------------------------------------------------------------------------------------------------------------------------------------------------------------------------------------------------------------------------------------------------------------------------------------------------------------------------------------------------------------------------------------------------------------------------------------------------------------------------------------------------------------|--|--|
| PCBP2   | PB.8415.24<br>PB.8415.27<br>PB.8415.75                       | YSTGSDSASF<br>PHHTTSPMCLN<br>PDLEGPPLEL<br>TK |                                                                                                       | There are many prolines, which might explain why there are so few b ions; meets all other criteria but PEP hovers around minimum criterion                                                                                                          | Yes | 210827_HUVEC5.6<br>tryp_HCDorbi_4hr_F<br>r12 | 185556 | Exon skipping event                                                                     | Deletion  | No (PB.8415.24, PB.8415.27, PB.8415.75) | <a href="https://genome.ucsc.edu/cgi-bin/hgTracks?db=hg38&amp;lastVirtModeType=customUrl&amp;lastVirtModeExtraState=multiRegionsBedUrl%3D%2Fuserdata%2Fsession%2F%2F13%2Fmm5db%2F0c7b0cfc%2Fhg%2FcustRgn_gnome_1e56d_a22290.bed+0&amp;virtModeType=customUrl&amp;virtMode=1&amp;multiRegionsBedUrl=%2Fuserdata%2Fsessions%2F%2F13%2Fmm5db%2F0c7b0cfc%2Fhg%2FcustRgn_gnome_1e56d_a22290.bed&amp;nonVirtPosition=chr12%3A53462482%2D53467240&amp;position=multi%3A19540330%2D19540670&amp;hgslid=1323801373_Av042a7GndrAACReEaCnRBP">https://genome.ucsc.edu/cgi-bin/hgTracks?db=hg38&amp;lastVirtModeType=customUrl&amp;lastVirtModeExtraState=multiRegionsBedUrl%3D%2Fuserdata%2Fsession%2F%2F13%2Fmm5db%2F0c7b0cfc%2Fhg%2FcustRgn_gnome_1e56d_a22290.bed+0&amp;virtModeType=customUrl&amp;virtMode=1&amp;multiRegionsBedUrl=%2Fuserdata%2Fsessions%2F%2F13%2Fmm5db%2F0c7b0cfc%2Fhg%2FcustRgn_gnome_1e56d_a22290.bed&amp;nonVirtPosition=chr12%3A53462482%2D53467240&amp;position=multi%3A19540330%2D19540670&amp;hgslid=1323801373_Av042a7GndrAACReEaCnRBP</a> |  |  |
| SCAMP3  | PB.954.9                                                     | DGGNPFAEP<br>SELDNPFQAS<br>AAAAATAELLK<br>K   |                                                                                                       | MS2 TIC only 16%, PEP barely meets criterion, too many missing fragment ions and unassigned peaks                                                                                                                                                   | No  | 210827_HUVEC5.6<br>tryp_HCDorbi_4hr_F<br>r14 | 222797 |                                                                                         |           |                                         |                                                                                                                                                                                                                                                                                                                                                                                                                                                                                                                                                                                                                                                                                                                                                                                                                                                                                                                                                                                                                                                                 |  |  |
| DAB2IP  | PB.6630.12<br>PB.6630.3P<br>B.6630.9                         | MVIENDLSGS<br>SGVQSPAR                        |                                                                                                       | Minimum 9 amino acids, Score>5, delta mass<5ppm, PEP<0.005, good b and y ion series, extra peaks do not exceed 25% above 10% relative intensity; MS2 TIC approx 48% (rough minimum is 20%); y5 ending in proline is                                 | Yes | 210827_HUVEC5.6<br>tryp_HCDorbi_4hr_F<br>r9  | 87656  | Alternative acceptor (3' splice site)                                                   | Deletion  | No (PB.6630.3, PB.6630.9, PB.6630.12)   | <a href="https://genome.ucsc.edu/cgi-bin/hgTracks?db=hg38&amp;lastVirtModeType=customUrl&amp;lastVirtModeExtraState=multiRegionsBedUrl%3D%2Fuserdata%2Fsession%2F%2F13%2Fmm5db%2F0c7b0cfc%2Fhg%2FcustRgn_gnome_1e56d_a22290.bed+0&amp;virtModeType=customUrl&amp;virtMode=1&amp;multiRegionsBedUrl=%2Fuserdata%2Fsessions%2F%2F13%2Fmm5db%2F0c7b0cfc%2Fhg%2FcustRgn_gnome_1e56d_a22290.bed&amp;nonVirtPosition=chr12%3A53462482%2D53467240&amp;position=multi%3A19540330%2D19540670&amp;hgslid=1323801373_Av042a7GndrAACReEaCnRBP">https://genome.ucsc.edu/cgi-bin/hgTracks?db=hg38&amp;lastVirtModeType=customUrl&amp;lastVirtModeExtraState=multiRegionsBedUrl%3D%2Fuserdata%2Fsession%2F%2F13%2Fmm5db%2F0c7b0cfc%2Fhg%2FcustRgn_gnome_1e56d_a22290.bed+0&amp;virtModeType=customUrl&amp;virtMode=1&amp;multiRegionsBedUrl=%2Fuserdata%2Fsessions%2F%2F13%2Fmm5db%2F0c7b0cfc%2Fhg%2FcustRgn_gnome_1e56d_a22290.bed&amp;nonVirtPosition=chr12%3A53462482%2D53467240&amp;position=multi%3A19540330%2D19540670&amp;hgslid=1323801373_Av042a7GndrAACReEaCnRBP</a> |  |  |
| ARVCF   | PB.13187.1<br>8 PB.13187.2 PB.13187.35 PB.13187.4 PB.13187.7 | GASSAGEASE<br>KEPLKGPSPA<br>SCS               |                                                                                                       | MS2 TIC at 20%, PEP just above minimum, significant unassigned fragment ions, 2 missed cleavages                                                                                                                                                    | No  | 210827_HUVEC5.6<br>tryp_HCDorbi_4hr_F<br>r4  | 42889  |                                                                                         |           |                                         |                                                                                                                                                                                                                                                                                                                                                                                                                                                                                                                                                                                                                                                                                                                                                                                                                                                                                                                                                                                                                                                                 |  |  |
| PRKCSH  | PB.11912.1<br>6                                              | AQOQELAA<br>DAFKELDDDM<br>DGTLLPRPR           |                                                                                                       | MS2 TIC only 13.5%, PEP just above minimum, significant unassigned fragment ions, 1 missed cleavages                                                                                                                                                | No  | 210827_HUVEC5.6<br>tryp_HCDorbi_4hr_F<br>r10 | 213920 |                                                                                         |           |                                         |                                                                                                                                                                                                                                                                                                                                                                                                                                                                                                                                                                                                                                                                                                                                                                                                                                                                                                                                                                                                                                                                 |  |  |
| UBAP2   | PB.6339.16                                                   | SQQTLDTTSS<br>VPAPK                           |                                                                                                       | Minimum 9 amino acids, Score>5, delta mass<5ppm, PEP<0.005, good b and y ion series, extra peaks do not exceed 25% above 10% relative intensity; MS2 TIC approx 43% (rough minimum is 20%); y4 ending in proline is among most abundant as expected | Yes | 210827_HUVEC5.6<br>tryp_HCDorbi_4hr_F<br>r6  | 52561  | Alternative acceptor (3' splice site)                                                   | Insertion | No (PB.6339.7, 6339.16)                 | <a href="https://genome.ucsc.edu/cgi-bin/hgTracks?db=hg38&amp;lastVirtModeType=customUrl&amp;lastVirtModeExtraState=multiRegionsBedUrl%3D%2Fuserdata%2Fsession%2F%2F13%2Fmm5db%2F0c7b0cfc%2Fhg%2FcustRgn_gnome_1e56d_a22290.bed+0&amp;virtModeType=customUrl&amp;virtMode=1&amp;multiRegionsBedUrl=%2Fuserdata%2Fsessions%2F%2F13%2Fmm5db%2F0c7b0cfc%2Fhg%2FcustRgn_gnome_1e56d_a22290.bed&amp;nonVirtPosition=chr12%3A53462482%2D53467240&amp;position=multi%3A19540330%2D19540670&amp;hgslid=1323801373_Av042a7GndrAACReEaCnRBP">https://genome.ucsc.edu/cgi-bin/hgTracks?db=hg38&amp;lastVirtModeType=customUrl&amp;lastVirtModeExtraState=multiRegionsBedUrl%3D%2Fuserdata%2Fsession%2F%2F13%2Fmm5db%2F0c7b0cfc%2Fhg%2FcustRgn_gnome_1e56d_a22290.bed+0&amp;virtModeType=customUrl&amp;virtMode=1&amp;multiRegionsBedUrl=%2Fuserdata%2Fsessions%2F%2F13%2Fmm5db%2F0c7b0cfc%2Fhg%2FcustRgn_gnome_1e56d_a22290.bed&amp;nonVirtPosition=chr12%3A53462482%2D53467240&amp;position=multi%3A19540330%2D19540670&amp;hgslid=1323801373_Av042a7GndrAACReEaCnRBP</a> |  |  |
| FAM120A | PB.6511.1                                                    | APAAAMGVQ<br>GFQDYIEK                         |                                                                                                       | Minimum 9 amino acids, Score>5, delta mass<5ppm, PEP<0.005, good b and y ion series, extra peaks do not exceed 25% above 10% relative intensity; MS2 TIC approx 42% (rough minimum is 20%)                                                          | Yes | 210827_HUVEC5.6<br>tryp_HCDorbi_4hr_F<br>r12 | 154811 | Usages of an ATG start that is further upstream than the ATG start annotated in GENCODE | Insertion | Yes (PB.6511.1)                         | <a href="https://genome.ucsc.edu/cgi-bin/hgTracks?db=hg38&amp;lastVirtModeType=customUrl&amp;lastVirtModeExtraState=multiRegionsBedUrl%3D%2Fuserdata%2Fsession%2F%2F13%2Fmm5db%2F0c7b0cfc%2Fhg%2FcustRgn_gnome_1e56d_a22290.bed+0&amp;virtModeType=customUrl&amp;virtMode=1&amp;multiRegionsBedUrl=%2Fuserdata%2Fsessions%2F%2F13%2Fmm5db%2F0c7b0cfc%2Fhg%2FcustRgn_gnome_1e56d_a22290.bed&amp;nonVirtPosition=chr12%3A53462482%2D53467240&amp;position=multi%3A19540330%2D19540670&amp;hgslid=1323801373_Av042a7GndrAACReEaCnRBP">https://genome.ucsc.edu/cgi-bin/hgTracks?db=hg38&amp;lastVirtModeType=customUrl&amp;lastVirtModeExtraState=multiRegionsBedUrl%3D%2Fuserdata%2Fsession%2F%2F13%2Fmm5db%2F0c7b0cfc%2Fhg%2FcustRgn_gnome_1e56d_a22290.bed+0&amp;virtModeType=customUrl&amp;virtMode=1&amp;multiRegionsBedUrl=%2Fuserdata%2Fsessions%2F%2F13%2Fmm5db%2F0c7b0cfc%2Fhg%2FcustRgn_gnome_1e56d_a22290.bed&amp;nonVirtPosition=chr12%3A53462482%2D53467240&amp;position=multi%3A19540330%2D19540670&amp;hgslid=1323801373_Av042a7GndrAACReEaCnRBP</a> |  |  |
| FAM120A | PB.6511.1                                                    | APAAAMGVQ<br>GFQDYIEK                         | same sequence as above (oxidized methionine version of a peptide already listed earlier in the table) | Doesn't meet PEP score criterion (since this sequence is just the Mox version of the peptide above, I don't think it makes sense to track down the other spectra)                                                                                   |     | 210827_HUVEC5.6<br>tryp_HCDorbi_4hr_F<br>r12 | 126162 |                                                                                         |           |                                         |                                                                                                                                                                                                                                                                                                                                                                                                                                                                                                                                                                                                                                                                                                                                                                                                                                                                                                                                                                                                                                                                 |  |  |

|        |             |                                                       |          |  |                                                                                                                                                                                                                                                                               |     |                                              |        |                                       |           |                     |                                                                                                                                                                                                                                                                                                                                                                                                                                                                                                                                                                                                                                                                                                                                           |  |
|--------|-------------|-------------------------------------------------------|----------|--|-------------------------------------------------------------------------------------------------------------------------------------------------------------------------------------------------------------------------------------------------------------------------------|-----|----------------------------------------------|--------|---------------------------------------|-----------|---------------------|-------------------------------------------------------------------------------------------------------------------------------------------------------------------------------------------------------------------------------------------------------------------------------------------------------------------------------------------------------------------------------------------------------------------------------------------------------------------------------------------------------------------------------------------------------------------------------------------------------------------------------------------------------------------------------------------------------------------------------------------|--|
| MAP4   | PB.2568.11  | MYHDDDLADLVFPSSATADT<br>SIFAGQNDPL<br>KDSYVPLELA<br>K | 3.759202 |  | Meets criteria but my only concern is that the y and b ions are not complementary and fairly sparse. This is likely because it's a z=4 ion and those don't tend to fragment very well. Would like to look at the raw data                                                     | Yes | 210827_HUVEC5.6<br>tryp_HCDorbi_4hr_F<br>r13 | 242854 | Exon skipping event                   | Deletion  | Yes<br>(PB.2568.11) | <a href="https://genome.ucsc.edu/cgi-bin/hgTracks?db=hg38&amp;lastVirtModeType=customUrl&amp;lastVirtModeExtraState=multiRegionsBedUrl%3D%2Fuserdata%2Fsession%2Ffr%2F13%2Fmm5db%2F0c7bcef%2Fhg%2FcustRgn_genome_1e56d_a22290.bed&amp;nonVirtPosition=chr3%3A47916970%2D47928353&amp;position=multi%3A58410401%2D58411028&amp;hgslid=13238013734Vn42a7GvdrAAcReEnOrB96">https://genome.ucsc.edu/cgi-bin/hgTracks?db=hg38&amp;lastVirtModeType=customUrl&amp;lastVirtModeExtraState=multiRegionsBedUrl%3D%2Fuserdata%2Fsession%2Ffr%2F13%2Fmm5db%2F0c7bcef%2Fhg%2FcustRgn_genome_1e56d_a22290.bed&amp;nonVirtPosition=chr3%3A47916970%2D47928353&amp;position=multi%3A58410401%2D58411028&amp;hgslid=13238013734Vn42a7GvdrAAcReEnOrB96</a> |  |
| MAP4   | PB.2568.11  | MYHDDDLADLVFPSSATADT<br>SIFAGQNDPL<br>KDSYVPLELA<br>K | 3.759202 |  | Too few y and b ions, PEP doesn't meet criterion, too many unassigned fragment ions                                                                                                                                                                                           | No  | 210827_HUVEC5.6<br>tryp_HCDorbi_4hr_F<br>r13 | 241977 |                                       |           |                     |                                                                                                                                                                                                                                                                                                                                                                                                                                                                                                                                                                                                                                                                                                                                           |  |
| ACTN4  | PB.12220.36 | AGTQIAIAQELNELDYDISH<br>NVNTR                         | 2.631441 |  | Y ion series looks very nice but the delta mass is over 300ppm, isolation of the C13 isotope                                                                                                                                                                                  | Yes | 210827_HUVEC5.6<br>tryp_HCDorbi_4hr_F<br>r13 | 217945 | Exon skipping event                   | Deletion  | No<br>(PB.12220.10) |                                                                                                                                                                                                                                                                                                                                                                                                                                                                                                                                                                                                                                                                                                                                           |  |
| PGAM5  | PB.8829.1   | EGAPIEPDP<br>VSHWKPEAV<br>YYEDGAR                     | 22.55521 |  | Minimum 9 amino acids, Score>5, delta mass<5ppm, PEP<0.005, good y ion series; a couple of complementary peaks, extra peaks may exceed 25% above 10% relative intensity; MS2 TIC only 16% (rough minimum is 20%); fragmentation actually looks decent considering it is a z=4 | Yes | 210827_HUVEC5.6<br>tryp_HCDorbi_4hr_F<br>r8  | 126553 | Alternative acceptor (3' splice site) | Deletion  | Yes(PB.8829.1)      |                                                                                                                                                                                                                                                                                                                                                                                                                                                                                                                                                                                                                                                                                                                                           |  |
| ARRB1  | PB.7883.9   | TASSDDDIIVFEDFAR                                      | 0.75184  |  | Minimum 9 amino acids, Score>5, delta mass<5ppm, PEP<0.005, good b and y ion series, extra peaks do not exceed 25% above 10% relative intensity; MS2 TIC approx 44% (rough minimum is 20%)                                                                                    | Yes | 210827_HUVEC5.6<br>tryp_HCDorbi_4hr_F<br>r4  | 171067 | Novel exon                            | Insertion | Yes<br>(PB.7883.9)  |                                                                                                                                                                                                                                                                                                                                                                                                                                                                                                                                                                                                                                                                                                                                           |  |
| SCAMP3 | PB.954.9    | DGGNPFAEP<br>SELDNPFQAS<br>AAAAAETLLK                 | 0.75184  |  | Minimum 9 amino acids, Score>5, delta mass<5ppm, PEP<0.005, good b and y ion series, extra peaks do not exceed 25% above 10% relative intensity; MS2 TIC approx 41% (rough minimum is 20%)                                                                                    | Yes | 210827_HUVEC5.6<br>tryp_HCDorbi_4hr_F<br>r13 | 249752 | Exon skipping event                   | Deletion  | Yes<br>(PB.954.9)   |                                                                                                                                                                                                                                                                                                                                                                                                                                                                                                                                                                                                                                                                                                                                           |  |

|         |                            |                                   |                                                                                                       |                                                                                                                                                                                                                                    |     |                                              |        |                                       |              |                                         |                                                                                                                                                                                                                                                                                                                                                                                                                                                                                                               |  |
|---------|----------------------------|-----------------------------------|-------------------------------------------------------------------------------------------------------|------------------------------------------------------------------------------------------------------------------------------------------------------------------------------------------------------------------------------------|-----|----------------------------------------------|--------|---------------------------------------|--------------|-----------------------------------------|---------------------------------------------------------------------------------------------------------------------------------------------------------------------------------------------------------------------------------------------------------------------------------------------------------------------------------------------------------------------------------------------------------------------------------------------------------------------------------------------------------------|--|
| EDC4    | PB.10482.1<br>0PB.10482.9  | STRPAPGPFLSYGAER                  |                                                                                                       | Looks really good except for mass difference (>500ppm), isolation of the C13 isotope                                                                                                                                               | Yes | 210827_HUVECS.6<br>tryp_HCDorbi_4hr_F<br>r15 | 72346  | Intron retention event                | Insertion    | No<br>(PB.10482.8,<br>PB.10482.9)       | <p>https://genome.ucsc.edu/cgi-bin/hgTracks?db=hg38&amp;lastVirtModeType=customUrl&amp;lastVirtModeExtraState=multiRegionsBedUrl%3D%2Fuserdata%2Fsession%2Frr%2F13%2Fmm5db%2F0c7bcef%2Fhg%2FcustRgn_gnome_1e56d_a22290.bed+0&amp;virtModeType=customUrl&amp;virtModeExtraState=multiRegionsBedUrl%3D%2Fuserdata%2Fsession%2Frr%2F13%2Fmm5db%2F0c7bcef%2Fhg%2FcustRgn_gnome_1e56d_a22290.bed+0&amp;virtPosition=chr16%3A67873052%2D67884499&amp;position=multi%3A331125092%2D331196308&amp;hsid=1331133675</p> |  |
| RBMS1   | PB.2016.3                  | MIFPSSSGNP<br>GGSSNCR             |                                                                                                       | Minimum 9 amino acids, Score>5, delta mass<5ppm, PEP<0.005, good b and y ion series, extra peaks do not exceed 25% above 10% relative intensity; MS2 TIC approx 29% (rough minimum is 20%); y14 ending in proline is most abundant | Yes | 210827_HUVECS.6<br>tryp_HCDorbi_4hr_F<br>r15 | 61807  | Alternative first exon                | Substitution | Yes<br>(PB.2016.3)                      | <p>bin/hgTracks?db=hg38&amp;lastVirtModeType=customUrl&amp;lastVirtModeExtraState=multiRegionsBedUrl%3D%2Fuserdata%2Fsession%2Frr%2F13%2Fmm5db%2F0c7bcef%2Fhg%2FcustRgn_gnome_1e56d_a22290.bed+0&amp;virtModeType=customUrl&amp;virtModeExtraState=multiRegionsBedUrl%3D%2Fuserdata%2Fsession%2Frr%2F13%2Fmm5db%2F0c7bcef%2Fhg%2FcustRgn_gnome_1e56d_a22290.bed+0&amp;virtPosition=chr2%3A160272151%2D160409380</p>                                                                                           |  |
| RBMS1   | PB.2016.3                  | MIFPSSSGNP<br>GGSSNCR             | same sequence as above (oxidized methionine version of a peptide already listed earlier in the table) | Minimum 9 amino acids, Score>5, delta mass<5ppm, PEP<0.005, good b and y ion series, extra peaks do not exceed 25% above 10% relative intensity; MS2 TIC approx 29% (rough minimum is 20%); y8 ending in proline is most abundant  | Yes | 210827_HUVECS.6<br>tryp_HCDorbi_4hr_F<br>r15 | 49330  |                                       |              |                                         |                                                                                                                                                                                                                                                                                                                                                                                                                                                                                                               |  |
| S100PBP | PB.335.4                   | SLVVSTSNK<br>DVLNKDSGK            |                                                                                                       | Mass difference too high (>500ppm), isolation of the C13 isotope                                                                                                                                                                   | Yes | 210827_HUVECS.6<br>tryp_HCDorbi_4hr_F<br>r11 | 43051  | Alternative acceptor (3' splice site) | Deletion     | Yes<br>(PB.335.4)                       | <p>https://genome.ucsc.edu/cgi-bin/hgTracks?db=hg38&amp;lastVirtModeType=customUrl&amp;lastVirtModeExtraState=multiRegionsBedUrl%3D%2Fuserdata%2Fsession%2Frr%2F13%2Fmm5db%2F0c7bcef%2Fhg%2FcustRgn_gnome_1e56d_a22290.bed+0&amp;virtModeType=customUrl&amp;virtModeExtraState=multiRegionsBedUrl%3D%2Fuserdata%2Fsession%2Frr%2F13%2Fmm5db%2F0c7bcef%2Fhg%2FcustRgn_gnome_1e56d_a22290.bed+0&amp;virtPosition=chr17%3A64319415%2D64390860&amp;position=multi%3A37911920%2D37919452&amp;hsid=1331133675</p>   |  |
| RPA1    | PB.10683.5                 | IGNVPVPYNEG<br>STVSK              |                                                                                                       | Minimum 9 amino acids, Score>5, delta mass<5ppm, PEP<0.005, good b and y ion series, extra peaks MAY exceed 25% above 10% relative intensity; MS2 TIC approx 17% (rough minimum is 20%); y10 ending in proline is most abundant    | Yes | 210827_HUVECS.6<br>tryp_HCDorbi_4hr_F<br>r8  | 66226  | Exon skipping event                   | Deletion     | Yes<br>(PB.10683.5)                     |                                                                                                                                                                                                                                                                                                                                                                                                                                                                                                               |  |
| PECAM1  | PB.11293.4<br>5PB.11293.80 | ELELLTSKDP<br>PPSASQSAGI<br>TDLGK |                                                                                                       | Mass difference too high (>300ppm), isolation of the C13 isotope                                                                                                                                                                   | Yes | 210827_HUVECS.6<br>tryp_HCDorbi_4hr_F<br>r11 | 112520 | Novel exon                            | Insertion    | No<br>(PB.11293.4<br>5,<br>PB.11293.80) |                                                                                                                                                                                                                                                                                                                                                                                                                                                                                                               |  |
| NHSL1   | PB.4914.1                  | CAGDIFGELE<br>GQAAALGHR           |                                                                                                       | Minimum 9 amino acids, Score>5, delta mass<5ppm, PEP<0.005, good b and y ion series, extra peaks exceed 25% above 10% relative intensity; MS2 TIC approx 15% (rough minimum is 20%)                                                | Yes | 210827_HUVECS.6<br>tryp_HCDorbi_4hr_F<br>r12 | 195591 | Alternative first exon                | Substitution | Yes                                     | <p>https://genome.ucsc.edu/cgi-bin/hgTracks?db=hg38&amp;lastVirtModeType=customUrl&amp;lastVirtModeExtraState=multiRegionsBedUrl%3D%2Fuserdata%2Fsession%2Frr%2F13%2Fmm5db%2F0c7bcef%2Fhg%2FcustRgn_gnome_1e56d_a22290.bed+0&amp;virtModeType=customUrl&amp;virtModeExtraState=multiRegionsBedUrl%3D%2Fuserdata%2Fsession%2Frr%2F13%2Fmm5db%2F0c7bcef%2Fhg%2FcustRgn_gnome_1e56d_a22290.bed+0&amp;virtPosition=chr6%3A138414829%2D138503008&amp;position=multi%3A73908187%2D73920000&amp;hsid=1331133675</p>  |  |









[illegible]



|          |                 |                                                |          |  |  |                                              |        |  |  |  |  |  |  |
|----------|-----------------|------------------------------------------------|----------|--|--|----------------------------------------------|--------|--|--|--|--|--|--|
| LRCH3    | PB.3162.17      | IGVPQELLK                                      | 0.75184  |  |  | 210827_HUVEC5.6<br>tryp_HCDorbi_4hr_F<br>r15 | 107154 |  |  |  |  |  |  |
| SMARCC2  | PB.8453.16      | EGERAGGEE<br>VR                                | 0.75184  |  |  | 210827_HUVEC5.6<br>tryp_HCDorbi_4hr_F<br>r9  | 131372 |  |  |  |  |  |  |
| SPOUT1   | PB.6707.6       | LNOQOHPDS<br>VTTPDCK                           | 1.127761 |  |  | 210827_HUVEC5.6<br>tryp_HCDorbi_4hr_F<br>r4  | 32468  |  |  |  |  |  |  |
| ZMYND8   | PB.12885.1<br>1 | TFSMADPGSA<br>ER                               | 4.511042 |  |  | 210827_HUVEC5.6<br>tryp_HCDorbi_4hr_F<br>r7  | 63314  |  |  |  |  |  |  |
| GLA      | PB.13773.3      | NFEAMVAEPK                                     | 4.886963 |  |  | 210827_HUVEC5.6<br>tryp_HCDorbi_4hr_F<br>r8  | 82400  |  |  |  |  |  |  |
| SLC25A29 | PB.9503.16      | GSQVPPMQL<br>SPGGPGR                           | 3.759202 |  |  | 210827_HUVEC5.6<br>tryp_HCDorbi_4hr_F<br>r11 | 28193  |  |  |  |  |  |  |
| FTSJ1    | PB.13630.7      | CDSQPALTPS<br>PCAFF                            | 1.127761 |  |  | 210827_HUVEC5.6<br>tryp_HCDorbi_4hr_F<br>r12 | 210744 |  |  |  |  |  |  |
| SCRN1    | PB.5171.16      | SQAEHHAG<br>AGEAR                              | 0.75184  |  |  | 210827_HUVEC5.6<br>tryp_HCDorbi_4hr_F<br>r7  | 34226  |  |  |  |  |  |  |
| PRXL2B   | PB.54.12        | GVSSQPWEG<br>WGLSK                             | 0.75184  |  |  | 210827_HUVEC5.6<br>tryp_HCDorbi_4hr_F<br>r11 | 137263 |  |  |  |  |  |  |
| UAP1L1   | PB.6811.13      | AVTRCAAAG<br>GCGLPAR                           | 0.75184  |  |  | 210827_HUVEC5.6<br>tryp_HCDorbi_4hr_F<br>r7  | 145605 |  |  |  |  |  |  |
| ZEB1     | PB.6948.22      | QANPRRNNA<br>GK                                | 0.75184  |  |  | 210827_HUVEC5.6<br>tryp_HCDorbi_4hr_F<br>r12 | 174748 |  |  |  |  |  |  |
| LAMA4    | PB.4847.99      | TLTINAFQHO<br>QCDGTFR                          | 6.766564 |  |  | 210827_HUVEC5.6<br>tryp_HCDorbi_4hr_F<br>r13 | 78624  |  |  |  |  |  |  |
| U2SURP   | PB.2954.16      | LREIEEKEK                                      | 0.75184  |  |  | 210827_HUVEC5.6<br>tryp_HCDorbi_4hr_F<br>r7  | 54435  |  |  |  |  |  |  |
| RAN      | PB.8811.11      | RNAAMAAQG<br>EPQVQFK                           | 3.007362 |  |  | 210827_HUVEC5.6<br>tryp_HCDorbi_4hr_F<br>r6  | 86809  |  |  |  |  |  |  |
| TM9SF4   | PB.12751.1<br>2 | GLGWGGMKL<br>DGEGR                             | 1.127761 |  |  | 210827_HUVEC5.6<br>tryp_HCDorbi_4hr_F<br>r10 | 157495 |  |  |  |  |  |  |
| TM9SF4   | PB.12751.1<br>2 | GLGWGGMKL<br>DGEGR                             | 1.127761 |  |  | 210827_HUVEC5.6<br>tryp_HCDorbi_4hr_F<br>r6  | 121642 |  |  |  |  |  |  |
| TXNRD1   | PB.8628.12      | QLDSTIGIHPV<br>CAEGSCHPG<br>WSAVV              | 4.511042 |  |  | 210827_HUVEC5.6<br>tryp_HCDorbi_4hr_F<br>r12 | 155884 |  |  |  |  |  |  |
| PRKAR2A  | PB.2585.28      | KIWHHLQFHR<br>ITVK                             | 0.75184  |  |  | 210827_HUVEC5.6<br>tryp_HCDorbi_4hr_F<br>r14 | 45225  |  |  |  |  |  |  |
| MAPRE1   | PB.12763.2      | IVDILYATDVC<br>V                               | 4.135122 |  |  | 210827_HUVEC5.6<br>tryp_HCDorbi_4hr_F<br>r15 | 202173 |  |  |  |  |  |  |
| GSPT1    | PB.10200.1<br>7 | GPAAPPPPVG<br>GAANNHGAG<br>SGAGGRADA<br>GK     | 0.75184  |  |  | 210827_HUVEC5.6<br>tryp_HCDorbi_4hr_F<br>r7  | 49405  |  |  |  |  |  |  |
| TSN      | PB.1936.15      | ELSQIGR                                        | 1.127761 |  |  | 210827_HUVEC5.6<br>tryp_HCDorbi_4hr_F<br>r11 | 79552  |  |  |  |  |  |  |
| ARHGDIA  | PB.11451.3      | CSOGAAQGW<br>GFAQGCWAVI<br>EGEVPTTGDL<br>ESFKK | 6.766564 |  |  | 210827_HUVEC5.6<br>tryp_HCDorbi_4hr_F<br>r14 | 216610 |  |  |  |  |  |  |
| GART     | PB.13065.1      | VQGILLQPP<br>E                                 | 3.759202 |  |  | 210827_HUVEC5.6<br>tryp_HCDorbi_4hr_F<br>r16 | 163319 |  |  |  |  |  |  |
